# Supplementary material for: Vascular Changes of the Choroid and Their Correlations With Visual Acuity in Pathological Myopia
Source: PubMed Central journal article supplement — Invest Ophthalmol Vis Sci. 2022 Nov 15;63(12):20. doi: 10.1167/iovs.63.12.20 (PMC9672896; doi:10.1167/iovs.63.12.20), 2022-11-15
Supplement: iovs-63-12-20_s001.pdf [file iovs-63-12-20_s001.pdf]

Title: Vascular changes of the choroid and their correlations with visual acuity in pathological myopia

Yiyi Wang<sup>\*1</sup>, Sisi Chen<sup>\*1,2</sup>, Jue Lin<sup>1</sup>, Wen Chen<sup>1</sup>, Huimin Huang<sup>1</sup>, Xin Fan<sup>1</sup>, Xinyuan Cao<sup>1</sup>, Meixiao Shen<sup>1</sup>, Jie Ye<sup>1</sup>, Shuangqian Zhu<sup>1</sup>, Anquan Xue<sup>1</sup>, Fan Lu<sup>§1,2</sup>, Yilei Shao<sup>§1</sup>

1. School of Ophthalmology and Optometry, Wenzhou Medical University, Wenzhou, China

2. Wenzhou Institute, University of Chinese Academy of Sciences, Wenzhou, China

\*These authors contributed equally to the work presented here and should therefore be regarded as equivalent authors.

**§Corresponding Authors:**

Yilei Shao, MD, PhD and Fan Lu, MD, OD

Mailing address: School of Ophthalmology and Optometry, Wenzhou Medical University, 270 Xueyuan Road, Wenzhou, Zhejiang, China, 325027.

Tel: (086) 577-88824116; Fax: (086) 577-88824115

Email: magic\_shao@163.com (Shao); lufan62@mail.eye.ac.cn (Lu)

## Supplementary Materials

**Supplementary Table 1.** Correlation Among Choroidal Parameters After Adjusting for Other Variables

| Parameters            |                | CVI (%) | CT (mm) | LA (mm <sup>2</sup> ) | SA (mm <sup>2</sup> ) |
|-----------------------|----------------|---------|---------|-----------------------|-----------------------|
| CVI (%)               | Coefficients   | -       | 0.068   | <b>0.033</b>          | -0.012                |
|                       | <i>P</i> value |         | 0.077   | <b>0.002</b>          | 0.521                 |
| CT (mm)               | Coefficients   | -       | -       | <b>3.737</b>          | <b>2.262</b>          |
|                       | <i>P</i> value |         |         | <b>&lt;0.001</b>      | <b>&lt;0.001</b>      |
| LA (mm <sup>2</sup> ) | Coefficients   | -       | -       | -                     | <b>1.543</b>          |
|                       | <i>P</i> value |         |         |                       | <b>&lt;0.001</b>      |

CVI, choroidal vascularity index; CT, choroidal thickness; LA, luminal area; SA, stromal area.

**Supplementary Table 2.** Partial Correlation Analysis Based on Best-Corrected Visual Acuity

| Control | Parameters |                | CVI (%)          | LA (mm <sup>2</sup> ) | SA (mm <sup>2</sup> ) | CT (mm) |
|---------|------------|----------------|------------------|-----------------------|-----------------------|---------|
| AL (mm) | BCVA       | Coefficients   | -0.318           | -0.15                 | -0.06                 | -0.12   |
|         | (LogMAR)   | <i>P</i> value | <b>&lt;0.001</b> | 0.09                  | 0.47                  | 0.18    |

AL, axial length; BCVA, Best-Corrected Visual Acuity; CT, choroidal thickness; CVI, choroidal vascularity index; LA, choroidal luminal area; SA, choroidal stromal area.

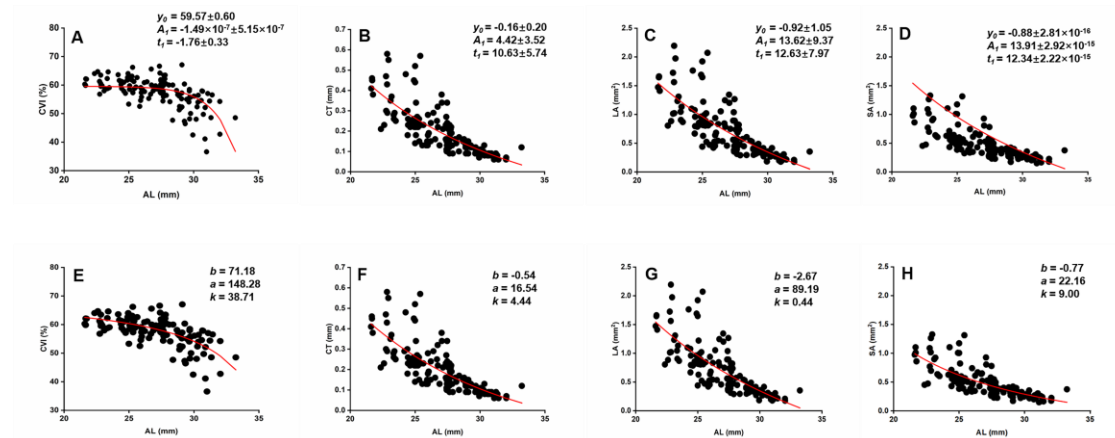

**Supplementary Figure 1.** The relationships among CVI, CT, LA, SA with AL were analyzed with exponential function and hyperbola. (A-D) CVI, CT, LA, and SA versus AL with exponential function [ $y = A_1 \times e^{(-x/t_1)} + y_0$ ], respectively. (E-H) CVI, CT, LA, and SA versus AL with hyperbola [ $y = a/(x - k) + b$ ], respectively. AL, axial length; CT, choroidal thickness; CVI, choroidal vascularity index; LA, choroidal luminal area; SA, choroidal stromal area. A1, t1, y0, a, k and b are constants.

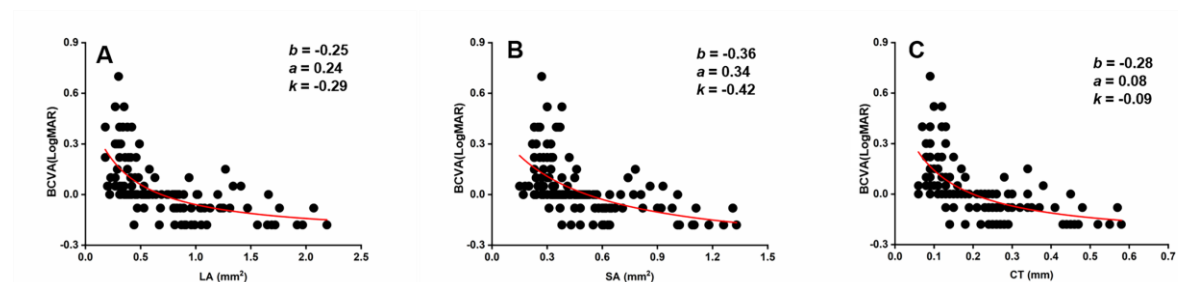

**Supplementary Figure 2.** The relationships among LA, SA, CT with AL were analyzed with hyperbola [ $y = a/(x - k) + b$ ]. (A) LA versus BCVA. (B) SA versus BCVA. (C) CT versus BCVA. a, k and b are constants.

BCVA, best-corrected visual acuity; LA, choroidal luminal area; SA, choroidal

stromal area; CT, choroidal thickness.
